# Supplementary material for: Dietary Inflammatory Index, Sleep Duration, and Sleep Quality: A Systematic Review
Source: MDPI journal article supplement (doi:10.3390/nu16060890), 2024-03-19
Supplement: s1 [file s1]

# Supplementary Material - Dietary Inflammatory Index, Sleep Duration and Quality: A Systematic Review

Christle Coxon <sup>1</sup>, Jun Nishihira <sup>2</sup> and & Piril Hepsomali <sup>3</sup>

## The Agency for Healthcare Research and Quality (AHRQ) checklist questions (Rostom et al., 2014)

Q1: Define source of information

Q2: List inclusion and exclusion criteria for subjects or refer to previous publications

Q3: Indicate whether subjects were consecutive if not population based. Whether subjects are representative of the average in the community?

Q4: Indicate time period used for identifying subjects

Q5: Indicate if evaluators of subjective components of study were masked to other aspects of the status of the participants

Q6: Is the examination method standard?

Q7: Describe any assessments undertaken for quality assurance purposes

Q8: Are the assessments and classification of caries index and BMI clearly stated and standard?

Q9: If any, explain any subject exclusions from analysis

Q10: Describe how confounding was assessed and/or controlled

Q11: Summarize patient response rates and completeness of data collection.

## References

1. Rostom, A., Dubé, C., Cranney, A., Saloojee, N., Sy, R., Garritty, C., Sampson, M., Zhang, L., Yazdi, F., & Mamaladze, V. (2014). Celiac Disease: Summary. In: AHRQ Evidence Report Summaries. Rockville (MD): Agency for Healthcare Research and Quality (US); 1998-2005. 104. Available from: <https://www.ncbi.nlm.nih.gov/books/NBK11885/>
